# Supplementary material for: Amino Acid Analyses of Plant Foods Used in the Dietary Management of Inherited Amino Acid Disorders
Source: MDPI journal article supplement (doi:10.3390/nu15102387), 2023-05-19
Supplement: s1 [file s1]

**Supplementary Table S1.** Correlation between protein (grams) and amino acids (mg) per 100 g food for fruits and vegetables analyzed by NSPKU.

| Variables               | Amino acids in fruits ( <i>n</i> = 8) <sup>a</sup> |      |      |      |      |     | Amino acids in vegetables ( <i>n</i> = 48) <sup>b</sup> |      |      |      |      |     |
|-------------------------|----------------------------------------------------|------|------|------|------|-----|---------------------------------------------------------|------|------|------|------|-----|
|                         | Protein                                            | Phe  | Leu  | Met  | Tyr  | Lys | Protein                                                 | Phe  | Leu  | Met  | Tyr  | Lys |
| <b>1. Protein</b>       | -                                                  |      |      |      |      |     | -                                                       |      |      |      |      |     |
| <b>2. Phenylalanine</b> | 0.74                                               | -    |      |      |      |     | 0.61                                                    | -    |      |      |      |     |
| <b>3. Leucine</b>       | 0.80                                               | 0.92 | -    |      |      |     | 0.57                                                    | 0.97 | -    |      |      |     |
| <b>4. Methionine</b>    | 0.63                                               | 0.98 | 0.84 | -    |      |     | 0.52                                                    | 0.88 | 0.89 | -    |      |     |
| <b>5. Tyrosine</b>      | 0.57                                               | 0.69 | 0.85 | 0.67 | -    |     | 0.55                                                    | 0.90 | 0.91 | 0.95 | -    |     |
| <b>6. Lysine</b>        | 0.80                                               | 0.70 | 0.91 | 0.58 | 0.78 | -   | 0.61                                                    | 0.93 | 0.94 | 0.91 | 0.88 | -   |

Abbreviations; Phe, phenylalanine; Leu, leucine; Met, methionine; Tyr, tyrosine; Lys, lysine; NSPKU, National Society for Phenylketonuria.

<sup>a</sup> Fruit crisps were not included in the analysis.

<sup>b</sup> Branded sweet potato fries (cooked) were not included in the analysis due the extra protein content from flour (e.g. rice flour, corn flour, etc.) used as a coating.
